# Supplementary material for: Lessons from a decade of individual-based models for infectious disease transmission: a systematic review (2006-2015)
Source: PubMed Central journal article supplement (PMC5594572; doi:10.1186/s12879-017-2699-8), 2017-09-11

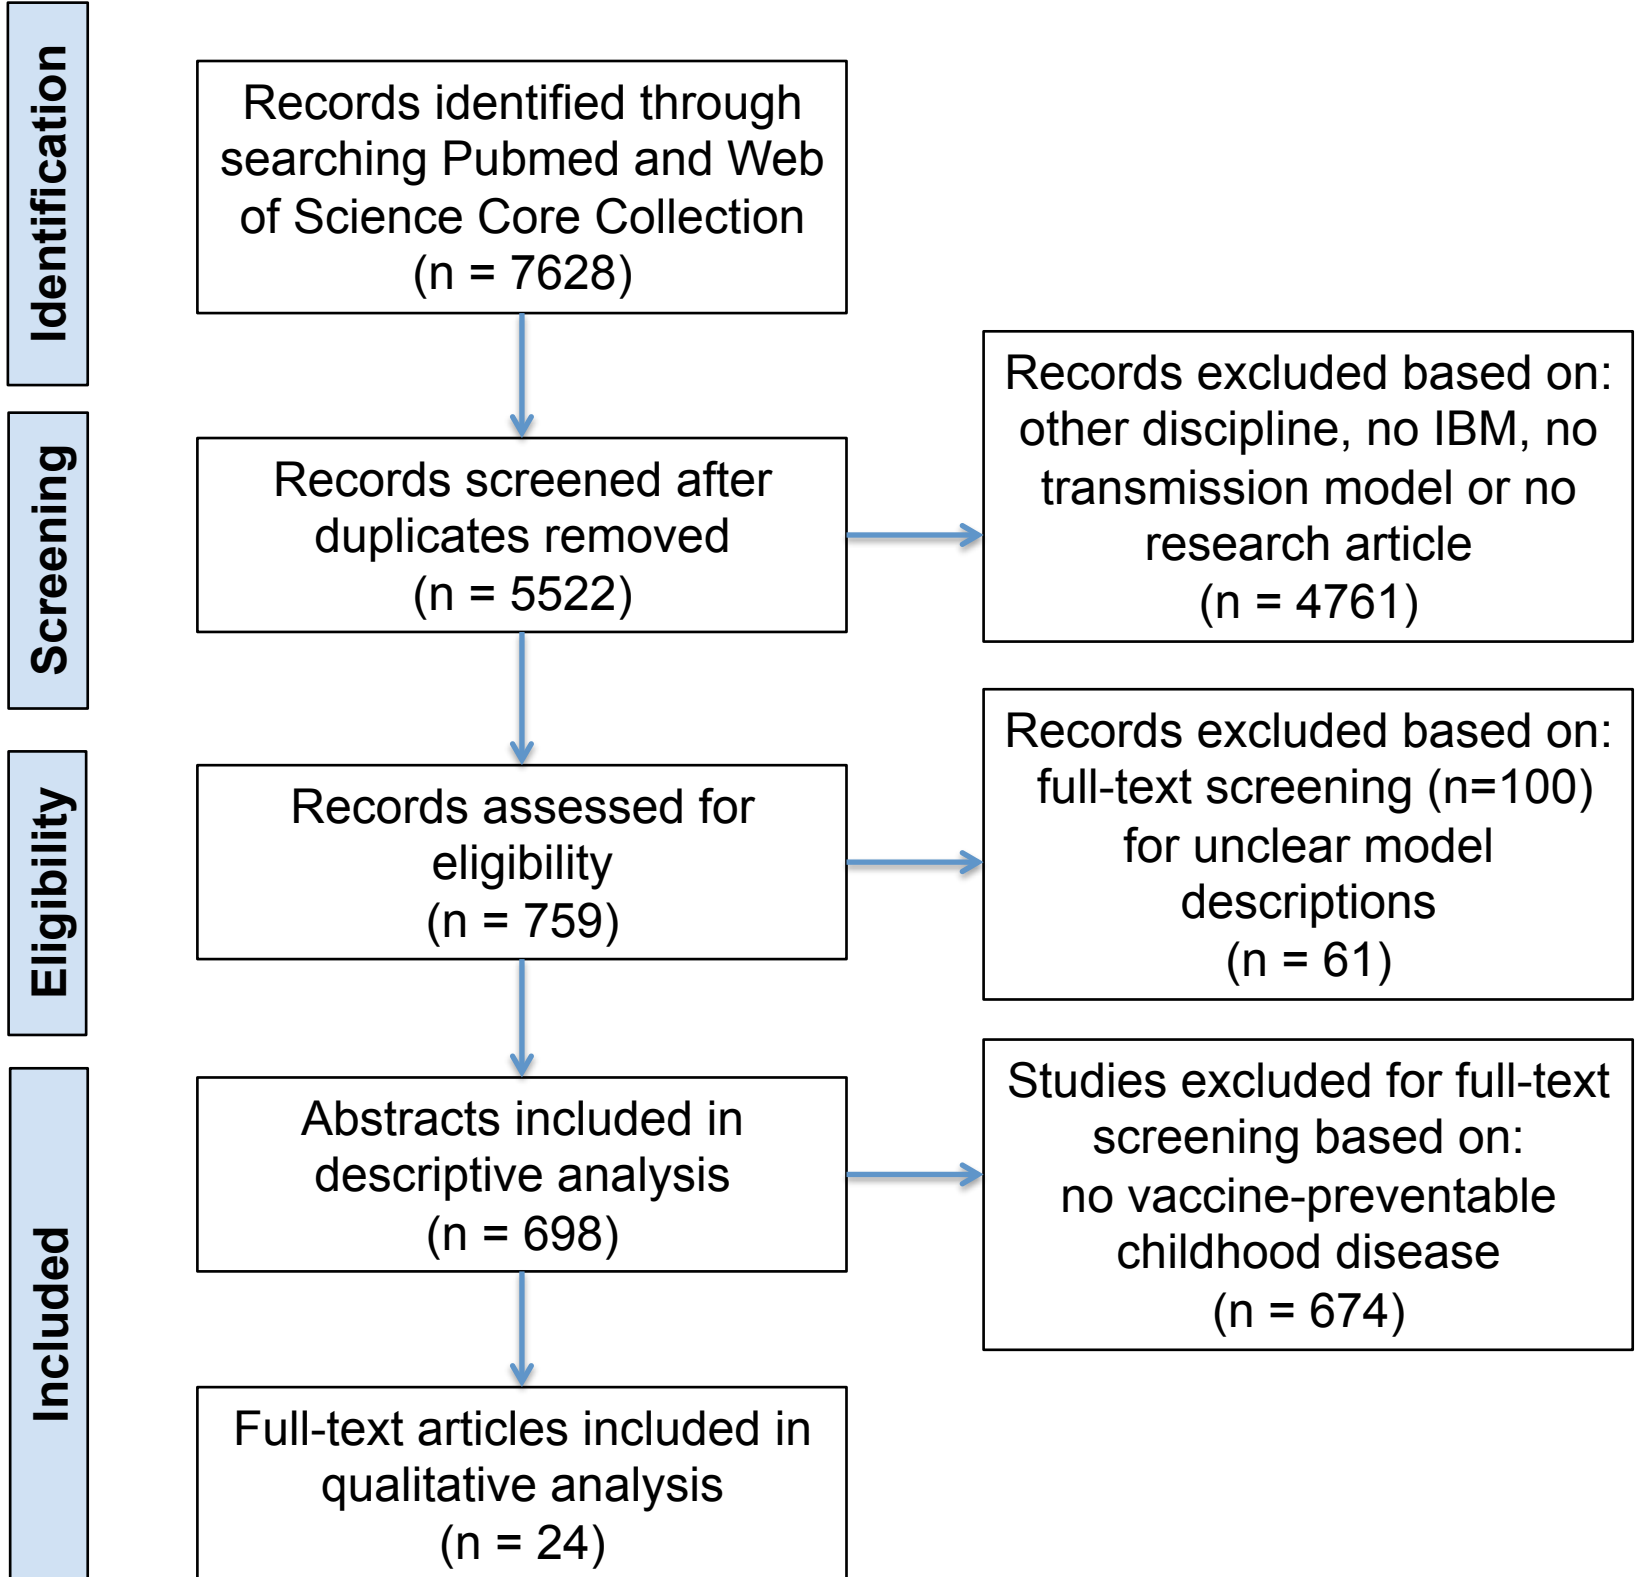

Supplement: 12879_2017_2699_MOESM1_ESM.pdf [file 12879_2017_2699_MOESM1_ESM.pdf]
